# Supplementary material for: Targeting MYC dependency in ovarian cancer through inhibition of CDK7 and CDK12/13
Source: eLife journal article supplement (doi:10.7554/elife.39030), 2018-11-13
Supplement: supp [file elife-39030-supp-v1.zip]

Archive with 11 entries (11 files):
- elife_poa_e39030_Figure_4_figure_supplement_2.pdf
- elife_poa_e39030_Figure_3_figure_supplement_1.pdf
- elife_poa_e39030_Figure_1_figure_supplement_1.pdf
- elife_poa_e39030_Figure_3_figure_supplement_2.pdf
- elife_poa_e39030_Figure_5_figure_supplement_1.pdf
- elife_poa_e39030_Transparent_Reporting_File.docx
- elife_poa_e39030_Figure_4_figure_supplement_1.pdf
- elife_poa_e39030_Figure_2_figure_supplement_1.pdf
- elife_poa_e39030_Figure_2_figure_supplement_2.pdf
- elife_poa_e39030_Supplementary_file_1.pdf
- elife_poa_e39030_Supplementary_file_2.pdf
