# Supplementary material for: Targeting MYC dependency in ovarian cancer through inhibition of CDK7 and CDK12/13
Source: eLife journal article supplement (doi:10.7554/elife.39030), 2018-11-13
Supplement: supp [file elife-39030-supp-v1.zip › elife_poa_e39030_Supplementary_file_1.pdf]

**Table S1. Epigenetic and transcriptional inhibitor library (related to Figure 2)**

| Compound Name  | Primary Target                          | Target category                   |
|----------------|-----------------------------------------|-----------------------------------|
| Olaparib       | PARP-1, PARP-2                          | polyADP ribose polymerase (PARP)  |
| Veliparib      | PARP-1, PARP-2                          | polyADP ribose polymerase (PARP)  |
| Vorinostat     | histone deacetylases (HDAC1,2,3,6)      | histone deacetylases (HDAC)       |
| Azacitidine    | DNMT                                    | DNA methyltransferase (DNMT)      |
| Decitabine     | DNMT                                    | DNA methyltransferase (DNMT)      |
| RG-108         | DNMT                                    | DNA methyltransferase (DNMT)      |
| Iniparib       | PARP1                                   | polyADP ribose polymerase (PARP)  |
| Rucaparib      | PARP1                                   | polyADP ribose polymerase (PARP)  |
| JW55           | TNKS1/2                                 | polyADP ribose polymerase (PARP)  |
| C646           | p300/CREB-binding protein (CBP)         | histone acetyl transferases (HAT) |
| garcinol       | p300 and PCAF                           | histone acetyl transferases (HAT) |
| Anacardic acid | PCAF and p300                           | histone acetyl transferases (HAT) |
| CTB            | p300 activator                          | histone acetyl transferases (HAT) |
| Belinostat     | histone deacetylases (HDAC)             | histone deacetylases (HDAC)       |
| Entinostat     | histone deacetylases (HDAC1,3)          | histone deacetylases (HDAC)       |
| Mocetinostat   | histone deacetylases (HDAC, class I,II) | histone deacetylases (HDAC)       |
| Pracinostat    | Pan-HDAC                                | histone deacetylases (HDAC)       |
| MC1568         | HDAC4                                   | histone deacetylases (HDAC)       |
| Rocilinostat   | HDAC6                                   | histone deacetylases (HDAC)       |
| selisistat     | SIRT1                                   | SIRT                              |
| AGK2           | SIRT2                                   | SIRT                              |
| Resveratrol    | SIRT1 activator                         | SIRT                              |
| BIX-01294      | G9A (EHMT2) and GLP1 (EHMT1) (on H3K9)  | histone lysine methyltransferases |
| UNC0638        | G9A (EHMT2) and GLP1 (EHMT1) (on H3K9)  | histone lysine methyltransferases |
| GSK-J1         | JMJD3 (on H3K27)                        | histone lysine demethylase        |
| GSK-J2         | JMJD3 (on H3K27)                        | histone lysine demethylase        |
| GSK-J4         | JMJD3 (on H3K27)                        | histone lysine demethylase        |

|                          |                         |                            |
|--------------------------|-------------------------|----------------------------|
| Daminozide               | KDM2/7                  | histone lysine demethylase |
| methylstat               | KDM4A/JMJD2A            | histone lysine demethylase |
| tranylcypromine          | LSD1 and LSD2           | histone lysine demethylase |
| PFI-1                    | BET (BRD2 and BRD4)     | Bromodomain                |
| (+)-JQ1                  | BET (BRD2, 3, 4, and T) | Bromodomain                |
| (-)-JQ1                  | BET (BRD2, 3, 4, and T) | Bromodomain                |
| GSK 525762A              | BET (BRD2/3/4 specific) | Bromodomain                |
| GSK1210151A              | BET (BRD4 and BRD3)     | Bromodomain                |
| Ischemin                 | CREB-binding protein    | Bromodomain                |
| UNC669                   | L3MBTL1                 | MBT                        |
| UNC1215                  | L3MBTL3                 | MBT                        |
| IOX2                     | PHD finger              | PHD finger                 |
| Epigallocatechin gallate | Telomerase              | Telomerase                 |
| CX-5461                  | RNA polymerase I        | RNA polymerase             |
| THZ1                     | CDK7, CDK12, CDK13      | transcriptional CDK        |
