# Supplementary material for: Targeting MYC dependency in ovarian cancer through inhibition of CDK7 and CDK12/13
Source: eLife journal article supplement (doi:10.7554/elife.39030), 2018-11-13
Supplement: supp [file elife-39030-supp-v1.zip › elife_poa_e39030_Supplementary_file_2.pdf]

**Table S2. Normalized MYC expression of compound screen (related to Figure 2)**

|                 | Ku    | Cov   |
|-----------------|-------|-------|
| DMSO            | 1     | 1     |
| THZ1            | 0.122 | 0.222 |
| Olaparib        | 1.428 | 1.02  |
| Veliparib       | 1.059 | 1.01  |
| Vorinostat      | 0.957 | 0.852 |
| Azacitidine     | 1.322 | 0.989 |
| Decitabine      | 1.16  | 0.811 |
| RG108           | 1.329 | 1.034 |
| Iniparib        | 1.145 | 1.068 |
| Rucaparib       | 0.905 | 1.036 |
| JW55            | 0.599 | 0.834 |
| DMSO            | 1     | 1     |
| THZ1            | 0.076 | 0.209 |
| EX527           | 0.655 | 1.208 |
| AGK2            | 0.703 | 1.367 |
| Resveratrol     | 0.721 | 1.501 |
| BIX01294        | 0.86  | 1.177 |
| UNC0638         | 1.186 | 1.326 |
| GSK-J1          | 0.953 | 1.408 |
| GSK-J2          | 0.931 | 1.266 |
| GSK-J4          | 0.871 | 1.079 |
| Daminozide      | 0.975 | 0.871 |
| Methylstat      | 0.604 | 1.051 |
| Tranylcypromine | 1.129 | 1.207 |

|                | Ku    | Cov   |
|----------------|-------|-------|
| DMSO           | 1     | 1     |
| THZ1           | 0.099 | 0.223 |
| C646           | 0.964 | 0.899 |
| Garcinol       | 0.786 | 0.958 |
| Anacardic acid | 0.996 | 1.088 |
| CTB            | 0.811 | 0.98  |
| Belinostat     | 0.603 | 0.779 |
| MS275          | 0.742 | 1.032 |
| Mocetinostat   | 0.911 | 0.828 |
| SB939          | 0.722 | 0.722 |
| MC1568         | 0.914 | 0.948 |
| Rocilinostat   | 0.843 | 0.919 |
| DMSO           | 1     | 1     |
| THZ1           | 0.096 | 0.212 |
| PFI-1          | 0.845 | 1.091 |
| JQ1            | 0.794 | 0.74  |
| (-)JQ1         | 1.115 | 1.342 |
| I-BET          | 0.825 | 0.96  |
| I-BET151       | 0.871 | 0.787 |
| Ischemin       | 0.946 | 1.315 |
| UNC669         | 1.253 | 1.235 |
| UNC1215        | 1.183 | 1.196 |
| IOX2           | 0.949 | 1.331 |
| EGCG           | 1.011 | 1.112 |
| CX5461         | 0.958 | 0.934 |
