# Supplementary figures and images for: Targeting MYC dependency in ovarian cancer through inhibition of CDK7 and CDK12/13
Source: eLife journal article supplement (doi:10.7554/elife.39030), 2018-11-13

Figure 4 - figure supplement 2

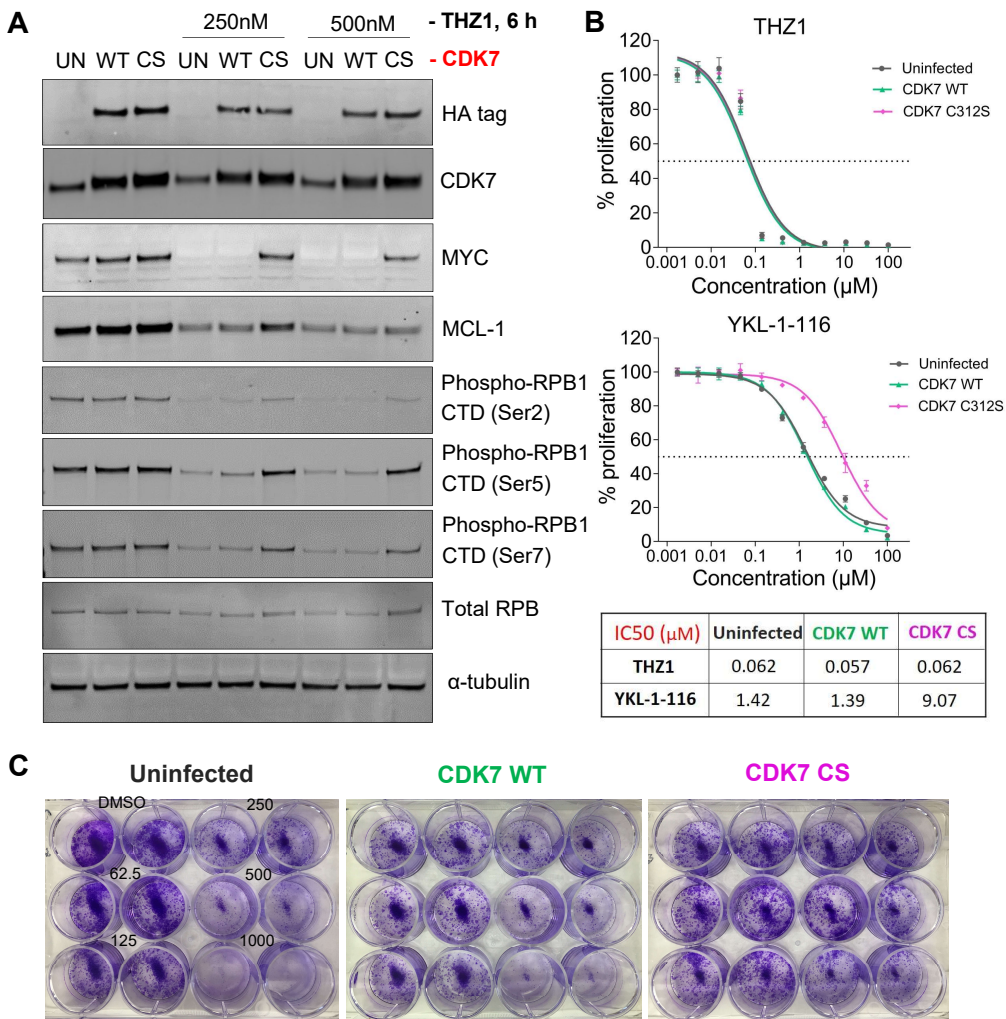

Supplement: supp [file elife-39030-supp-v1.zip]

Figure 2 - figure supplement 1

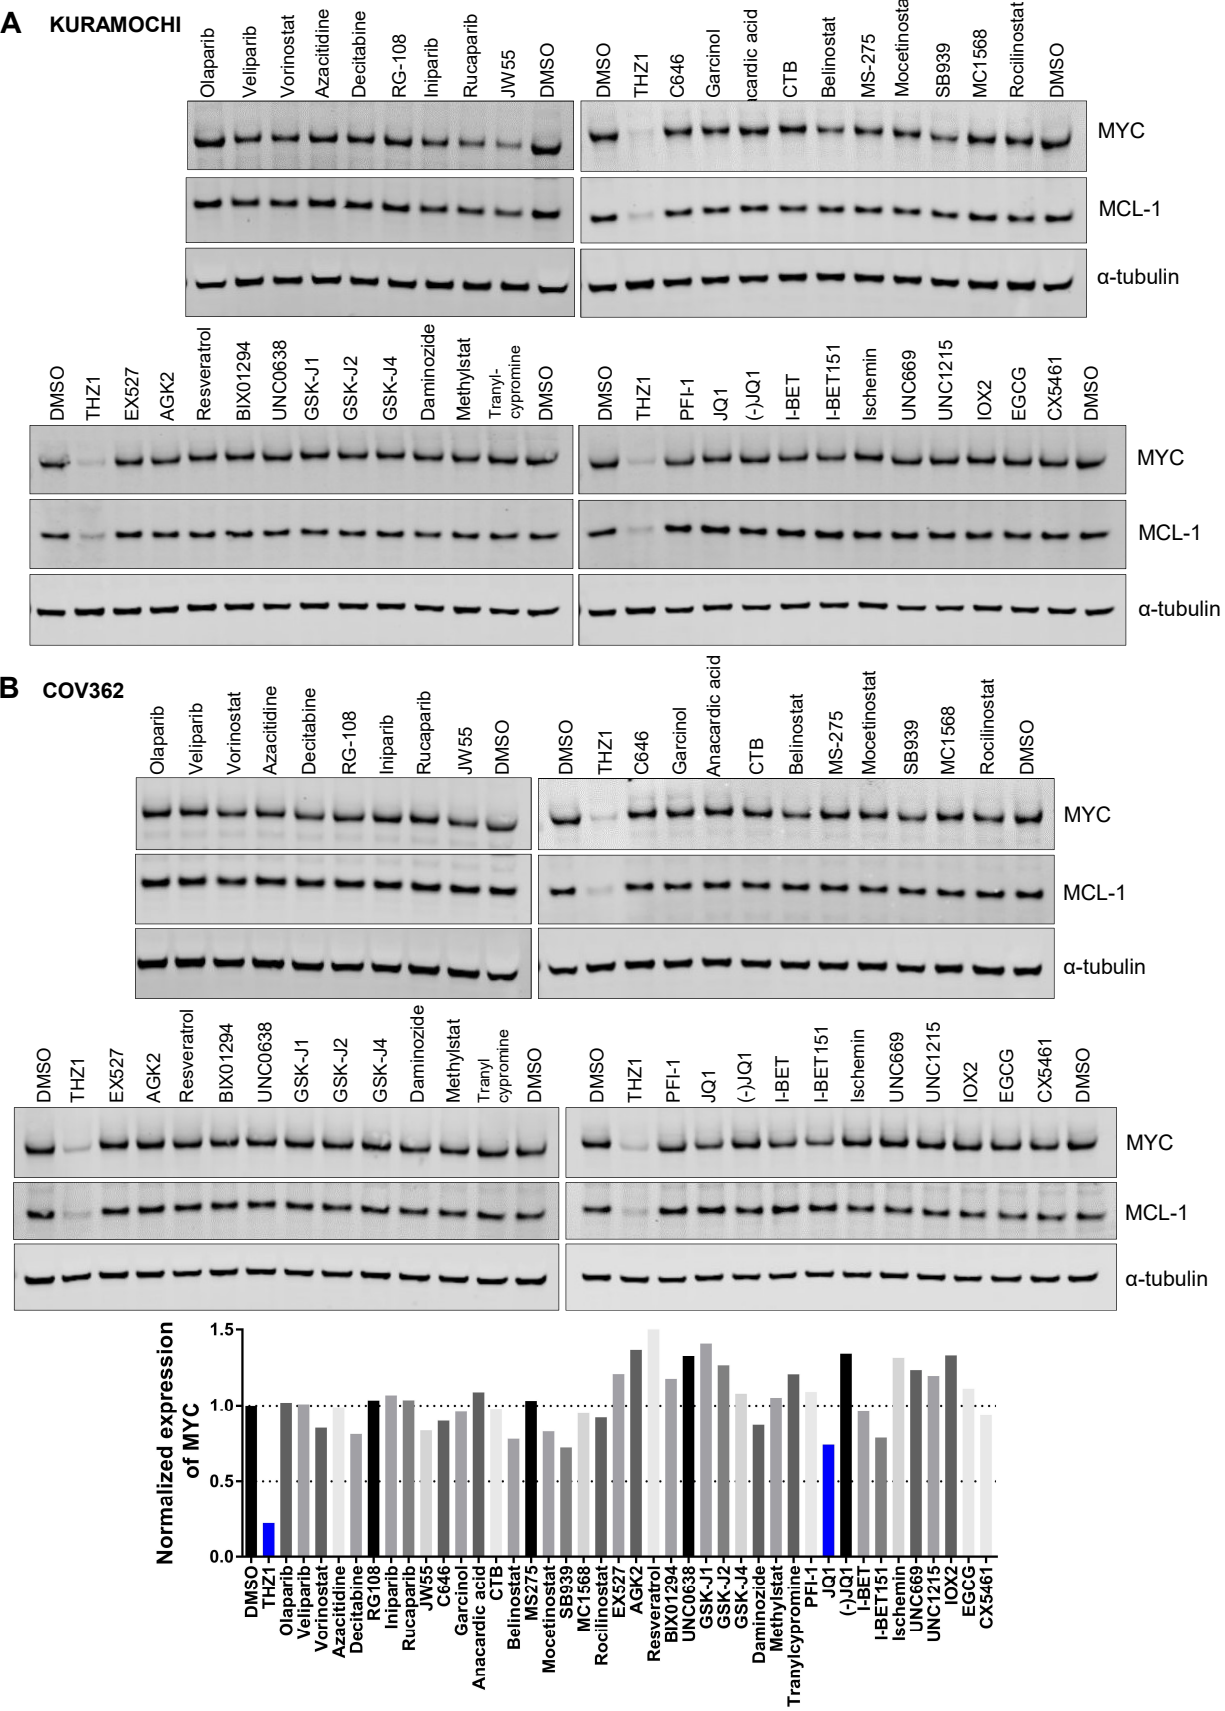

Supplement: supp [file elife-39030-supp-v1.zip]

Figure 4 - figure supplement 1

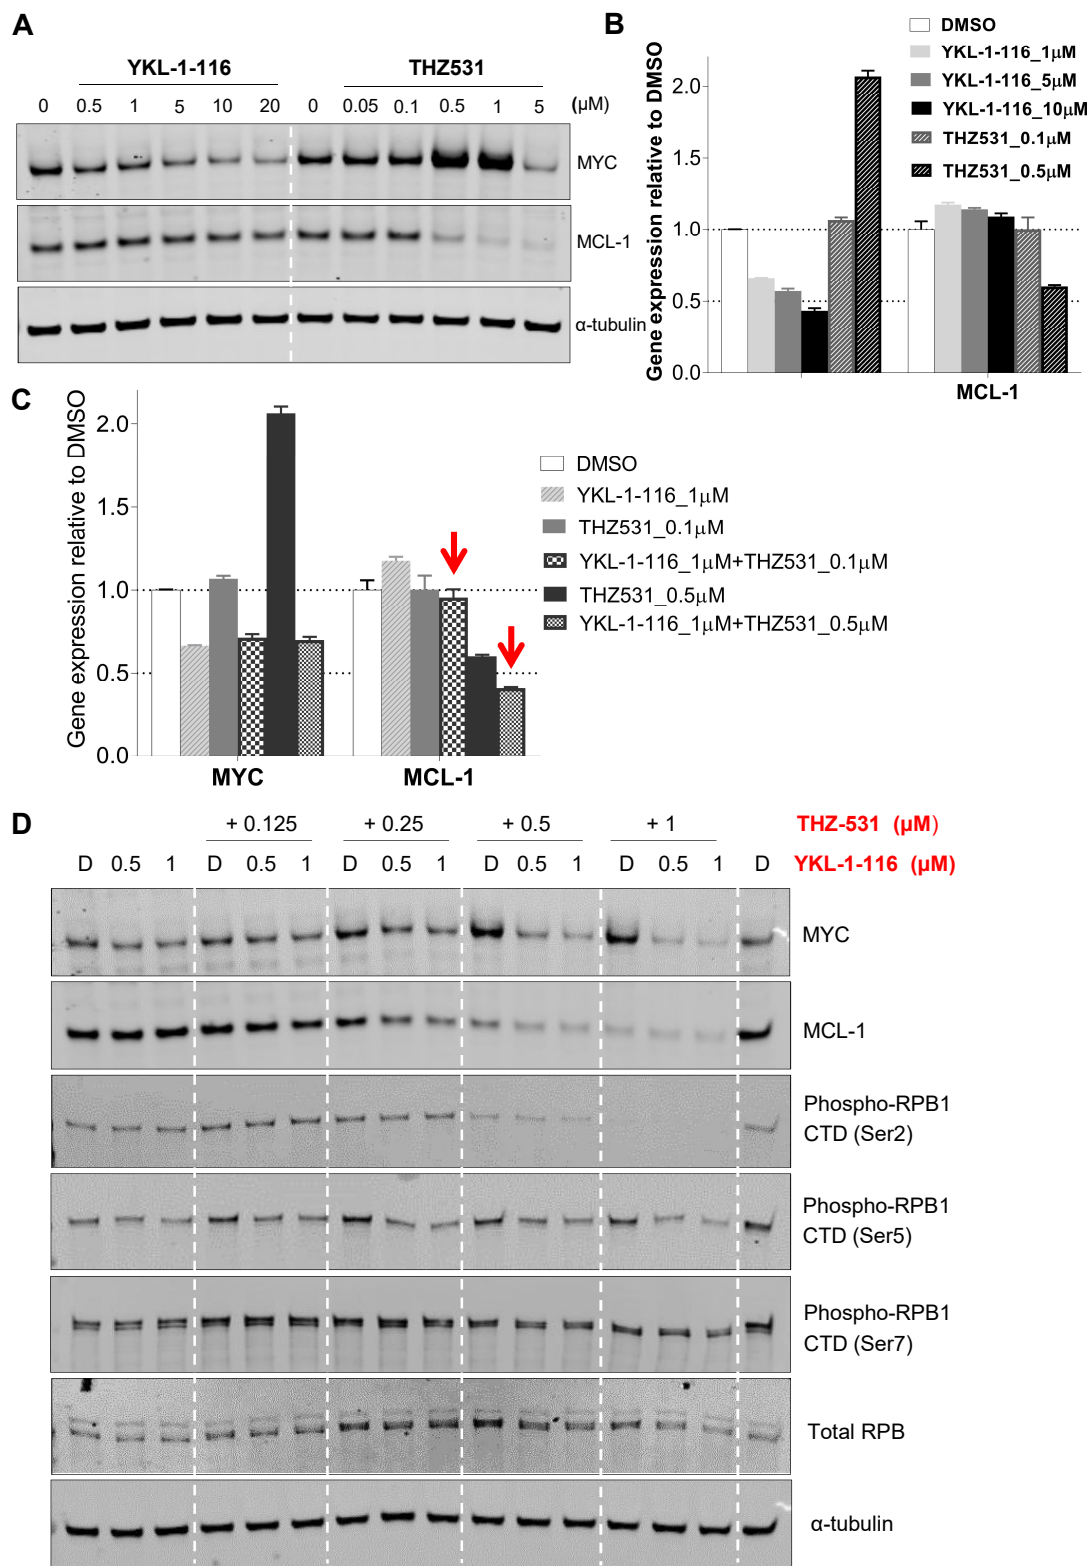

Supplement: supp [file elife-39030-supp-v1.zip]

**Figure 1 - figure supplement 1**

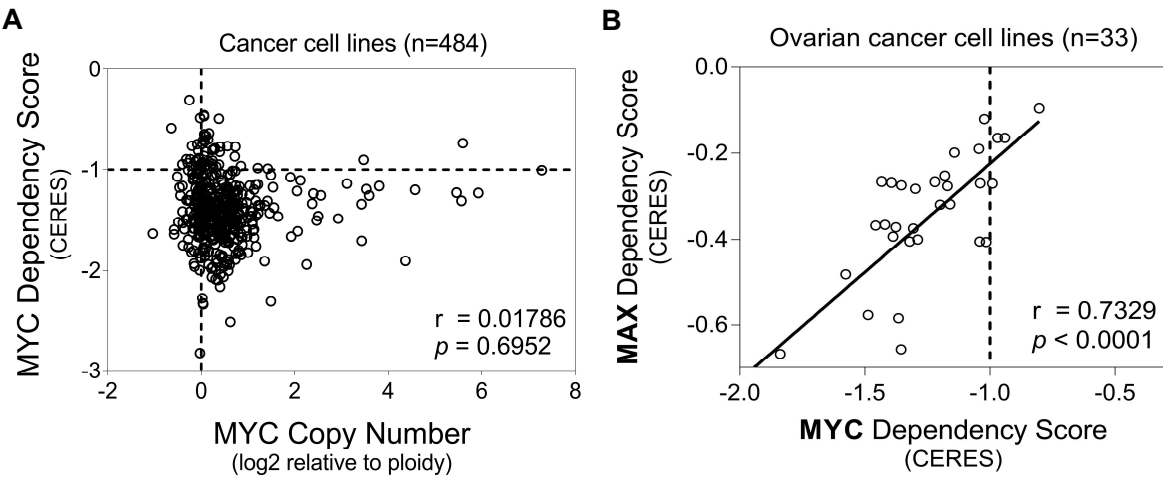

Supplement: supp [file elife-39030-supp-v1.zip]

Figure 3 - figure supplement 1

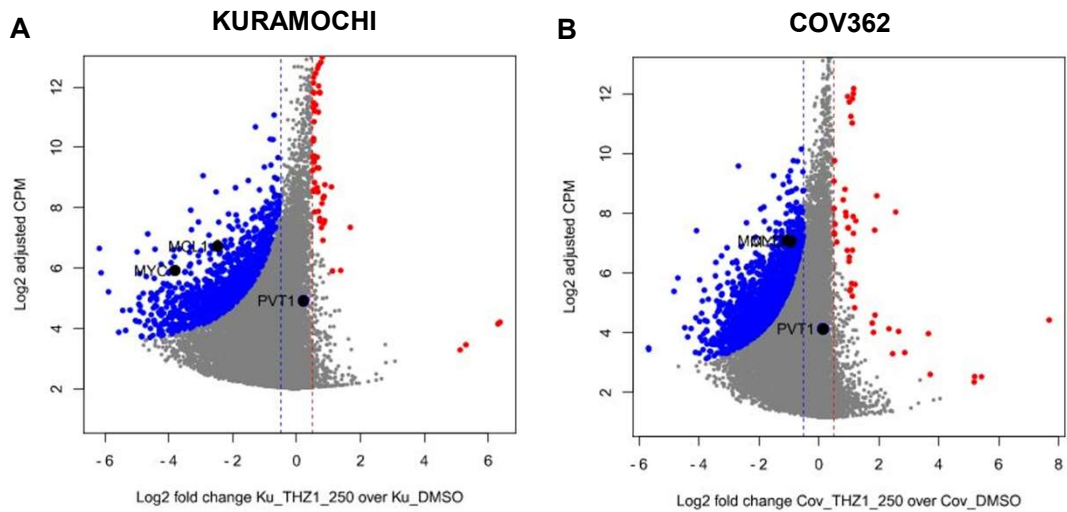

Supplement: supp [file elife-39030-supp-v1.zip › elife_poa_e39030_Figure_3_figure_supplement_1.pdf]

Figure 3 - figure supplement 2

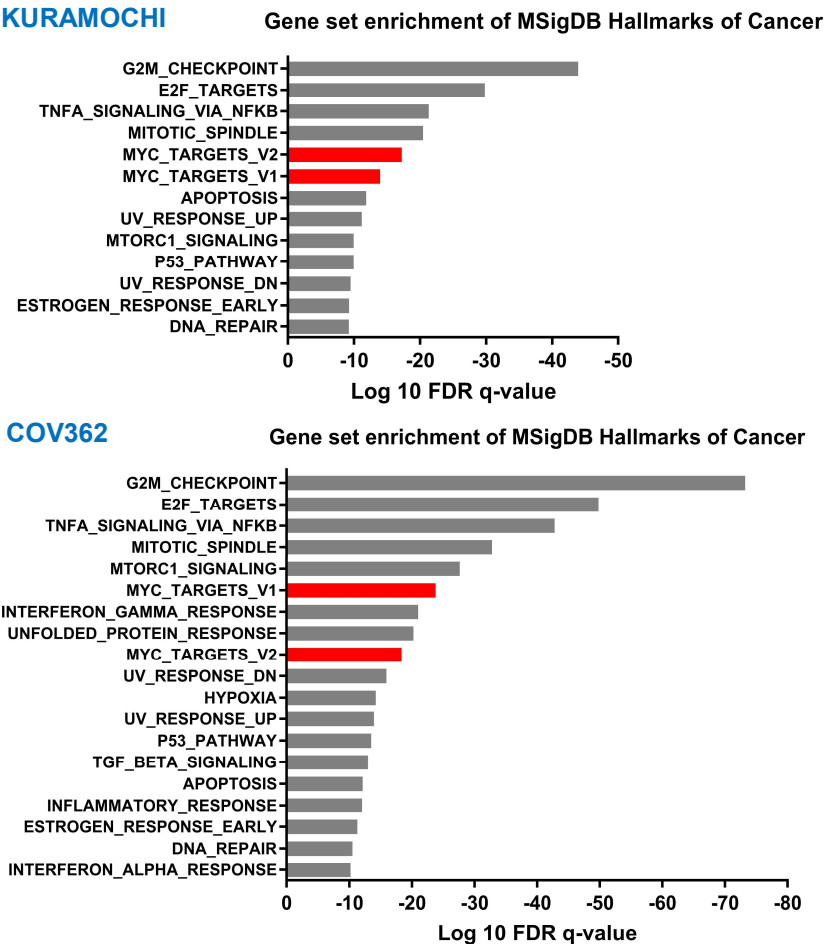

Supplement: supp [file elife-39030-supp-v1.zip › elife_poa_e39030_Figure_3_figure_supplement_2.pdf]

**Figure 5 - figure supplement 1**

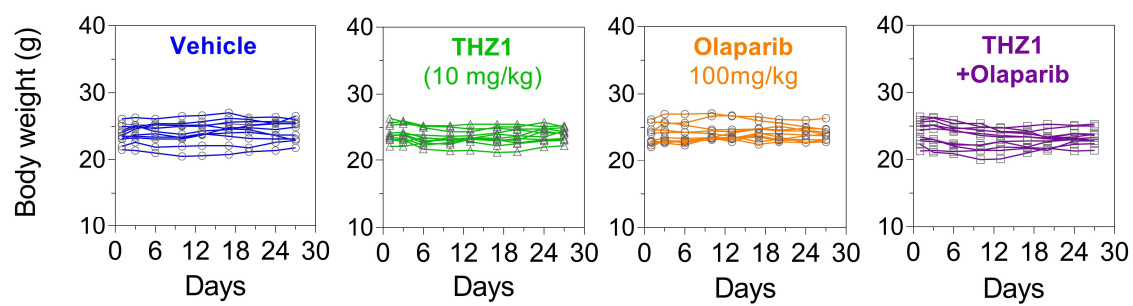

Supplement: supp [file elife-39030-supp-v1.zip › elife_poa_e39030_Figure_5_figure_supplement_1.pdf]

Figure 2 - figure supplement 2

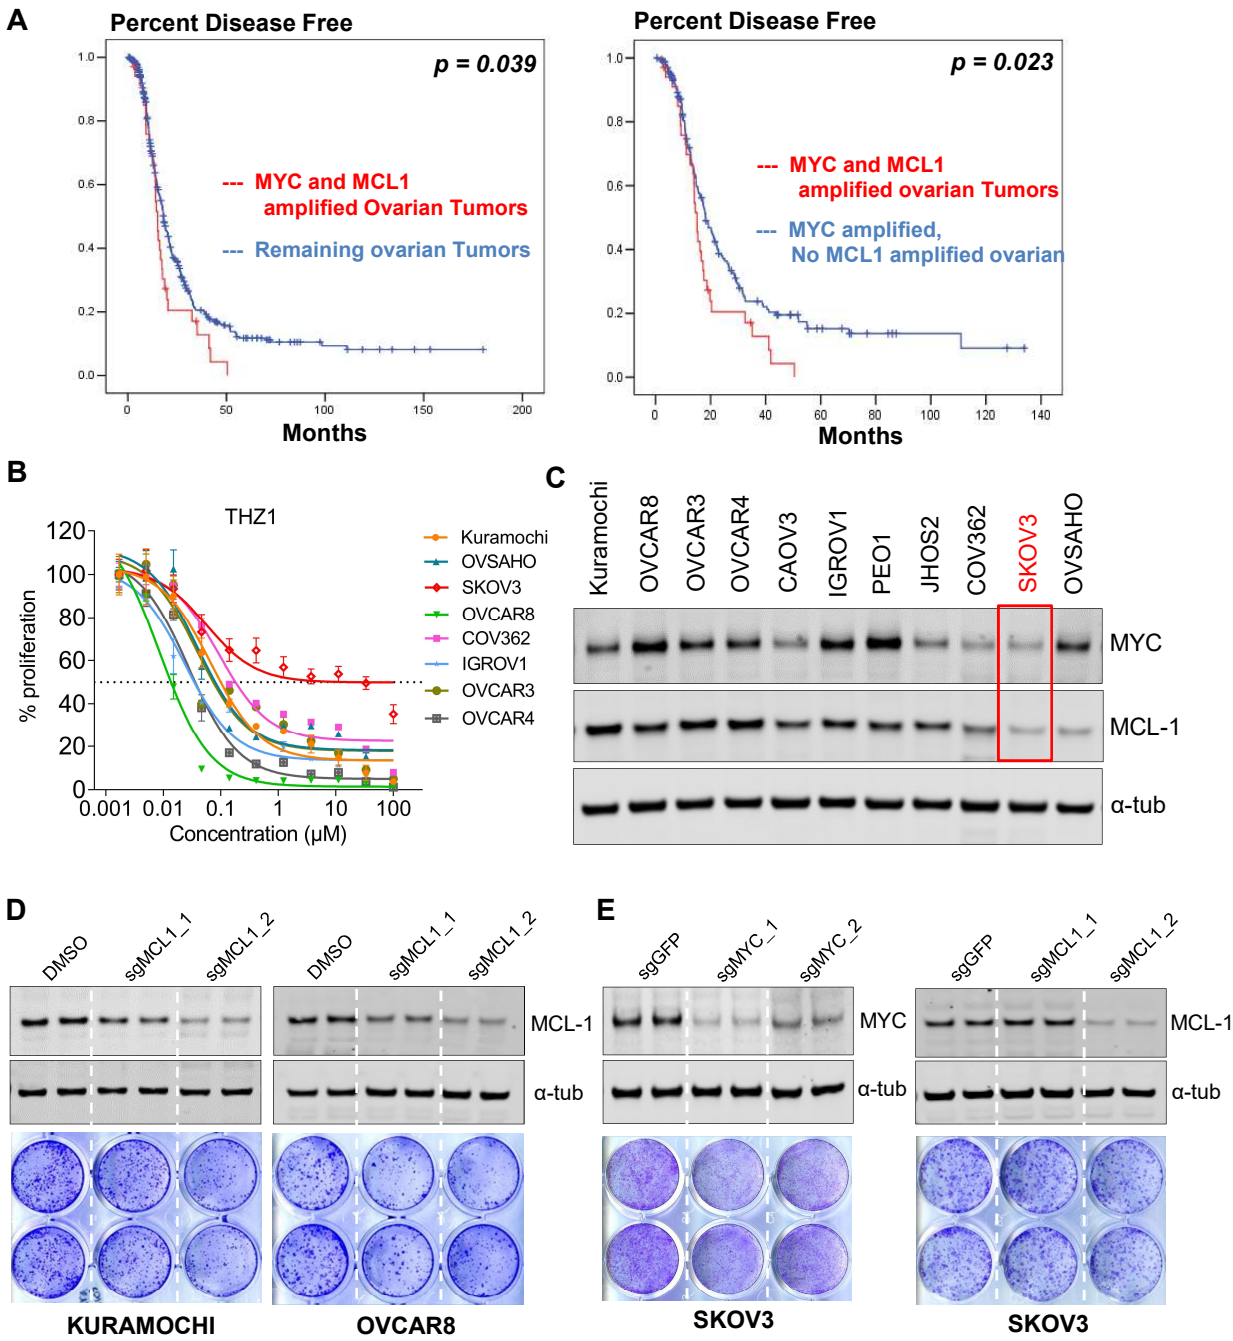

Supplement: supp [file elife-39030-supp-v1.zip › elife_poa_e39030_Figure_2_figure_supplement_2.pdf]
